# Supplementary material for: A novel RLIM/RNF12 variant disrupts protein stability and function to cause severe Tonne–Kalscheuer syndrome
Source: PubMed Central journal article supplement (PMC8100121; doi:10.1038/s41598-021-88911-3), 2021-05-05

# Supplementary Figure 1

a Control

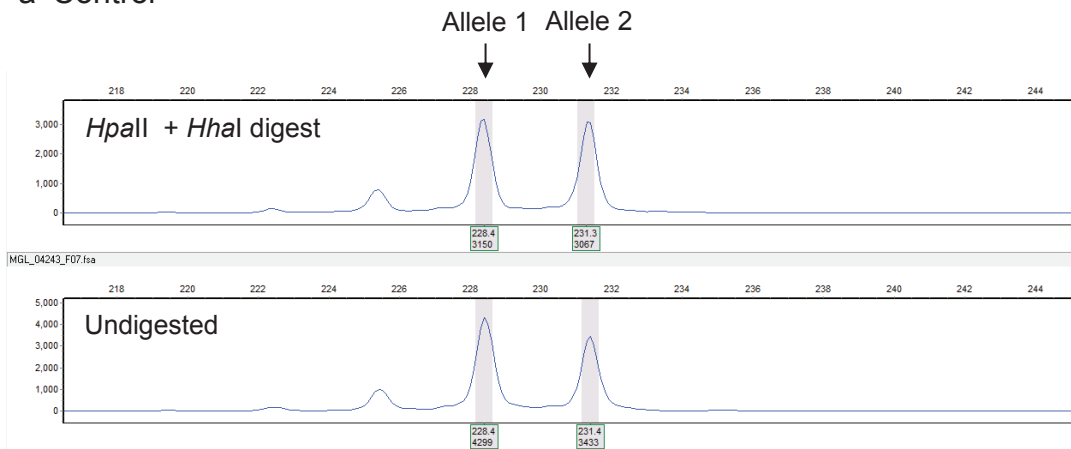

b II:2

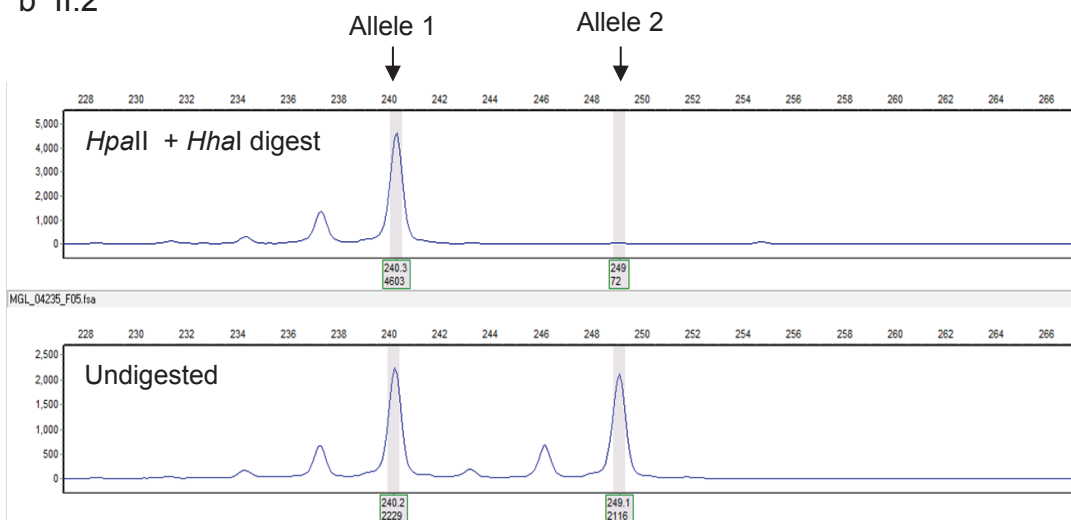

| Subject | Fragment length (bp) allele 1 | Fragment length (bp) allele 2 | Cells with allele 1 as active X-chromosome (%) | Cells with allele 2 as active X-chromosome (%) |
|---------|-------------------------------|-------------------------------|------------------------------------------------|------------------------------------------------|
| Control | 228                           | 231                           | 50                                             | 50                                             |
| II:2    | 240                           | 249                           | 5                                              | 95                                             |

**Supplementary Figure 1:** Skewed X-chromosome inactivation in the proband's mother (II:2). DNA was subjected to methylation sensitive restriction enzyme digestion followed by PCR and fragment analysis. The inactive X-chromosome is not digested. Figure was generated using SoftGenetics GeneMarker v2.7 (<https://softgenetics.com/GeneMarker.php>).

## Supplementary Figure 2

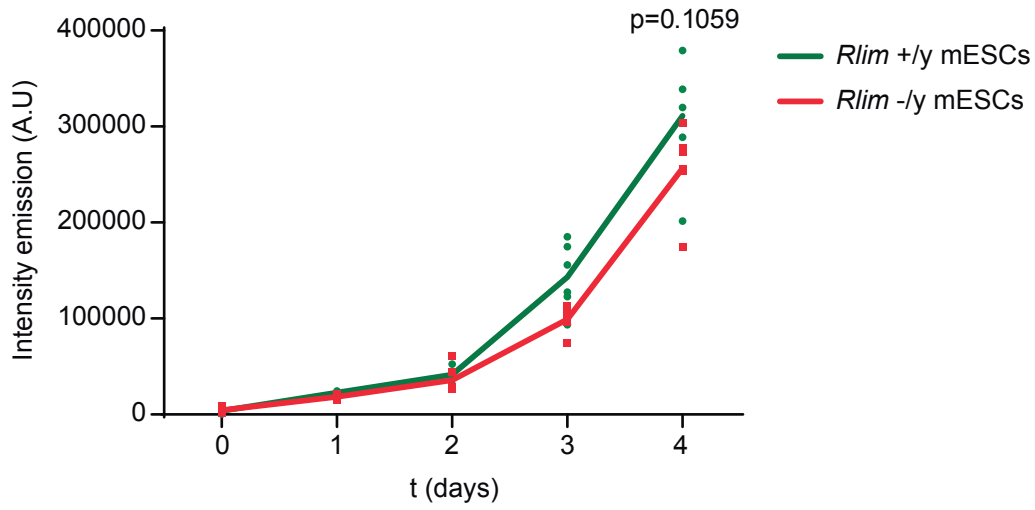

**Supplementary Figure 2:** Proliferation curves for indicated mESC lines cultured in LIF/FCS as determined by MTS assay. Data are represented as mean  $\pm$  standard error of the mean (n=3). Statistical significance was determined by student's t-test. Figure was generated using Graphpad Prism v8.0 (<https://www.graphpad.com/scientific-software/prism/>).

# Supplementary Figure 3: Unprocessed gels and blots

## Figure 2a

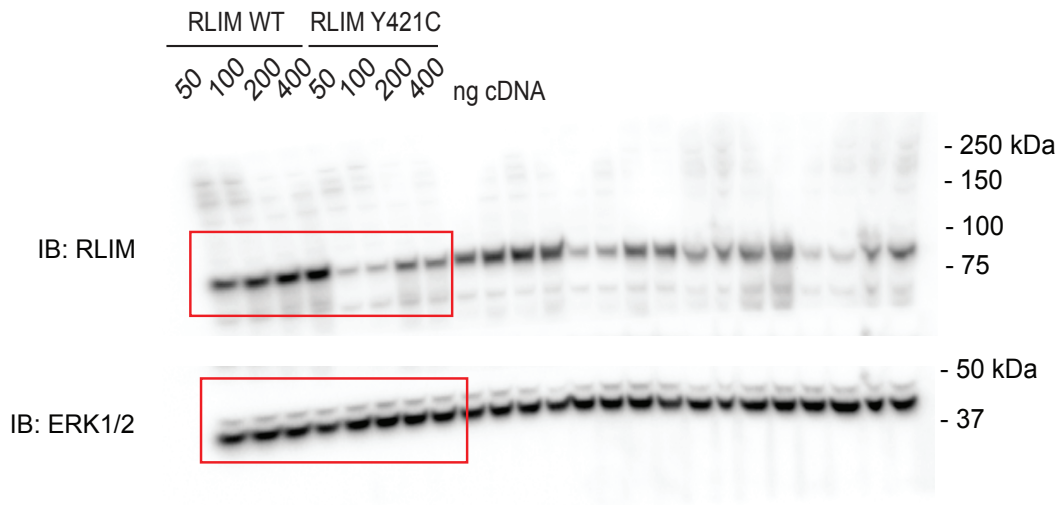

## Figure 2c

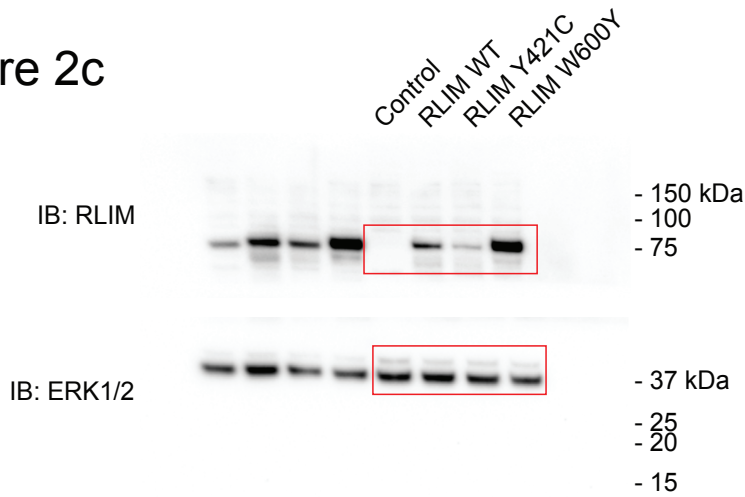

## Figure 2c

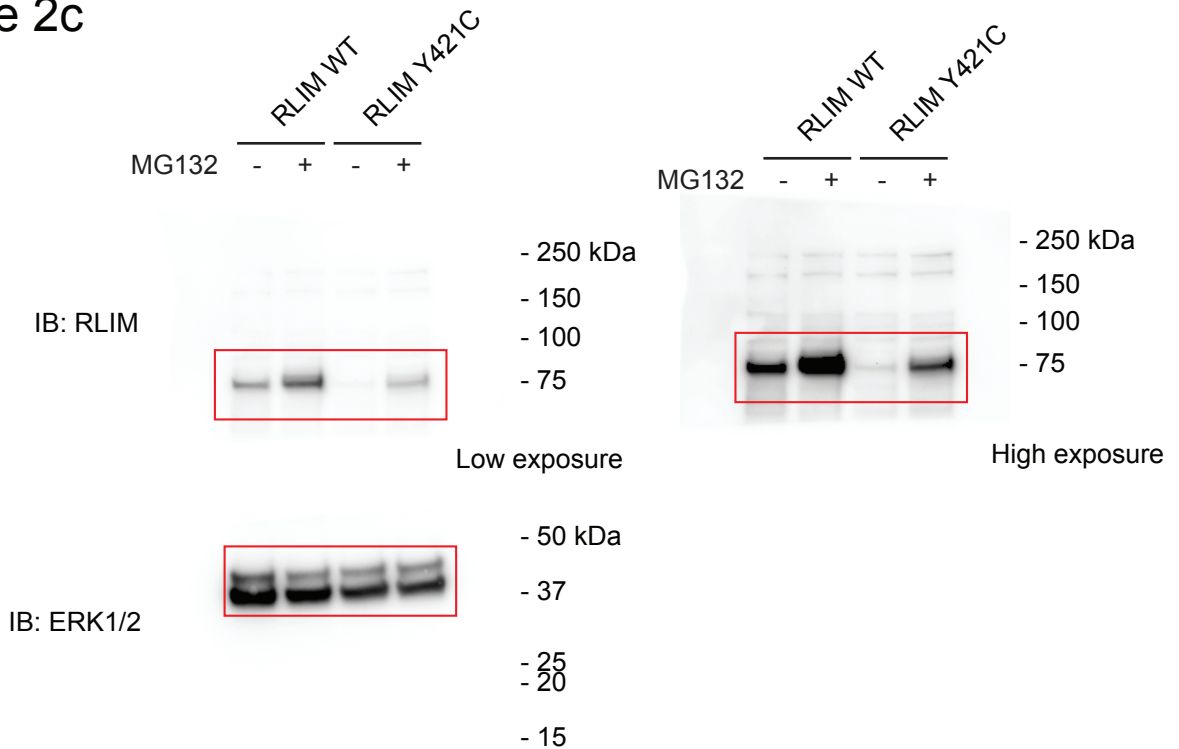

Figure 3a

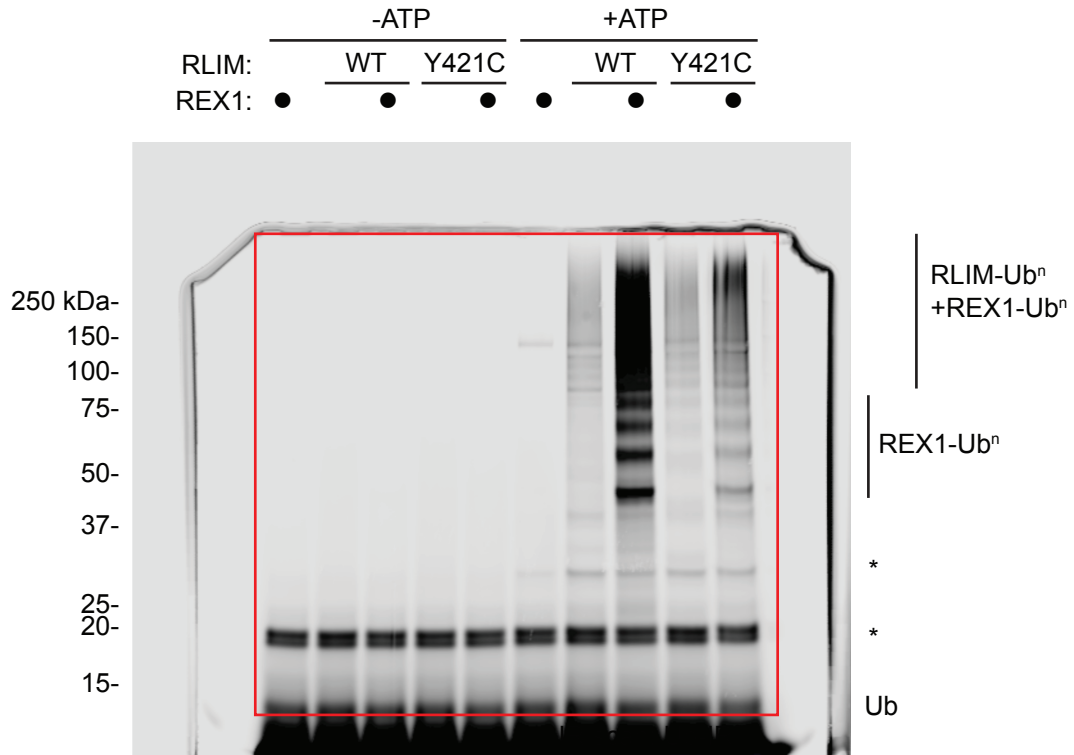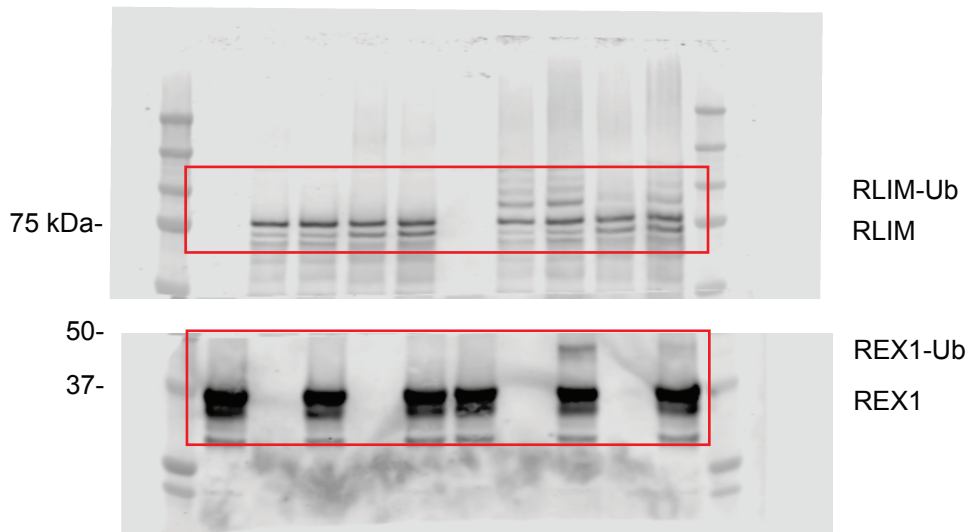

Figure 4b

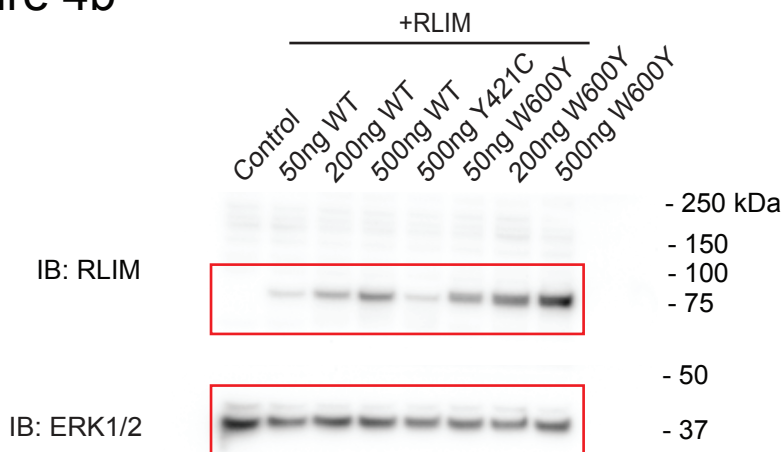

Supplement: 41598_2021_88911_MOESM1_ESM.pdf [file 41598_2021_88911_MOESM1_ESM.pdf]
